# Supplementary material
Source: publisher figshare collection journal article supplement (https://future-science-group.figshare.com/articles/dataset/_/19121849)
Supplement: Supplementary file 1 [file 1]

Supplemental Table 3 Multivariable Cox analysis of patients stratified by income, place of living, education, and insurance status

| Variables                 | HR (95% CI)                       | P     |
|---------------------------|-----------------------------------|-------|
|                           | Non-academic vs. Academic centers |       |
| Income $\geq$ \$35,00     | 1.176 (1.162-1.190)               | 0.001 |
| Income $<$ \$35,000       | 1.175 (1.159-1.192)               | 0.001 |
| Urban place of living     | 1.176 (1.165-1.186)               | 0.001 |
| Rural place of living     | 1.182 (1.101-1.269)               | 0.001 |
| Having health insurance   | 1.174 (1.163-1.185)               | 0.001 |
| No health insurance       | 1.205 (1.144-1.270)               | 0.001 |
| High education-level area | 1.164 (1.150-1.178)               | 0.001 |
| Low education-level area  | 1.187 (1.171-1.204)               | 0.001 |

Multivariate Cox analysis for each subset analysis includes age at diagnosis, race, education, income, place of living, insurance status, Charlson score, year of diagnosis, and stage.
