# Supplementary material
Source: publisher figshare collection journal article supplement (https://future-science-group.figshare.com/articles/dataset/_/19121849)
Supplement: Supplementary file 2 [file 1]

Supplemental Table 2 The 1:1 (academic=89,721 non-academic=89,721) Propensity Score Matched analysis results of overall survival

| Variable                      |                         | Propensity Score Matched Analysis |       |
|-------------------------------|-------------------------|-----------------------------------|-------|
|                               |                         | Hazard Ratio (95% CI)             | P     |
| Hospital Type                 | Academic                | Ref                               |       |
|                               | Community               | 1.174 (1.162-1.186)               | 0.001 |
| Sex                           | Male                    | Ref                               |       |
|                               | Female                  | 0.944 (0.935-0.954)               |       |
| Age at diagnosis (continuous) |                         | 1.012 (1.011-1.012)               | 0.001 |
| Race                          | White                   | Ref                               |       |
|                               | Black                   | 0.996 (0.982-1.011)               | 0.61  |
|                               | neither White nor Black | 0.879 (0.856-0.904)               | 0.001 |
| Education                     | >=13% NHD*              | 0.984 (0.971-0.996)               | 0.01  |
|                               | <13% NHD*               | Ref                               |       |
| Income                        | >=\$35,000              | Ref                               |       |
|                               | <\$35,000               | 1.079 (1.066-1.093)               | 0.001 |
| Place of Living               | Urban                   | Ref                               |       |
|                               | Rural                   | 1.048 (1.001-1.096)               | 0.04  |
| Insurance Status              | Insured                 | Ref                               |       |
|                               | Not insured             | 1.057 (1.027-1.089)               | 0.001 |
| Charlson/Deyo Score           | 0                       | Ref                               |       |
|                               | 1                       | 1.117 (1.104-1.131)               | 0.001 |

|                   |           |                     |       |
|-------------------|-----------|---------------------|-------|
|                   | >=2       | 1.350 (1.326-1.375) | 0.001 |
| Year of Diagnosis | 2004-2010 | 1.200 (1.187-1.212) | 0.001 |
|                   | 2011-2016 | Ref                 |       |
| M stage           | M0        | 0.574 (0.567-0.580) | 0.001 |
|                   | M1        | Ref                 |       |
| Chemotherapy      | Yes       | Ref                 |       |
|                   | No        | 2.043 (2.020-2.066) | 0.001 |
| Radiation Therapy | Yes       | Ref                 |       |
|                   | No        | 1.102 (1.085-1.119) | 0.001 |
| Immunotherapy     | Yes       | Ref                 |       |
|                   | No        | 1.207 (1.108-1.314) | 0.001 |

\*NHD: No high school degree
