# Supplementary material
Source: publisher figshare collection journal article supplement (https://future-science-group.figshare.com/articles/dataset/_/19121849)
Supplement: Supplementary file 3 [file 1]

Supplemental Table 1 Baseline characteristics of the patients by those who changed facility during the treatment and those who did not

| Variable                         |                         | Moved centers during the treatment<br>173,025 (66%) | Did not move during treatments<br>89,184 (34%) | P     |
|----------------------------------|-------------------------|-----------------------------------------------------|------------------------------------------------|-------|
| Age at diagnosis, Median (range) |                         | 70 (40-90)                                          | 71 (40-90)                                     |       |
| Sex                              | Male                    | 86,856 (50.2%)                                      | 44,612 (50.0%)                                 | 0.39  |
|                                  | Female                  | 86,169 (49.8%)                                      | 44,572 (50.0%)                                 |       |
| Race                             | White                   | 144,676 (84.7%)                                     | 72,609 (82.2%)                                 | 0.001 |
|                                  | Black                   | 20,694 (12.1%)                                      | 12,224 (13.8%)                                 |       |
|                                  | neither White nor Black | 5,474 (3.20%)                                       | 3,510 (4.0%)                                   |       |
| Education                        | >=13% NHD               | 74,864 (43.5%)                                      | 38,657 (43.4%)                                 | 0.7   |
|                                  | <13% NHD                | 97,241 (56.5%)                                      | 50,362 (56.6%)                                 |       |
| Income                           | >=\$35,000              | 100,172 (58.2%)                                     | 51,698 (58.1%)                                 | 0.5   |
|                                  | <35,000                 | 71,833 (41.8%)                                      | 37,281 (41.9%)                                 |       |
| Place of Living                  | Urban                   | 165,225 (98.1%)                                     | 85,387 (98.1%)                                 | 0.6   |
|                                  | Rural                   | 3,205 (1.9%)                                        | 1,628 (1.9%)                                   |       |
| Insurance Status                 | Yes                     | 163,612 (97.09%)                                    | 85,051 (96.83%)                                | 0.001 |
|                                  | No                      | 4,899 (2.91%)                                       | 2,785 (3.17%)                                  |       |
| Charlson/Deyo Score              | 0                       | 115,217 (66.6%)                                     | 55,260 (62.0%)                                 | 0.001 |

|                   |           |                 |                |       |
|-------------------|-----------|-----------------|----------------|-------|
|                   | 1         | 41,484 (24.0%)  | 22,484 (25.2%) |       |
|                   | >=2       | 16,324 (9.4%)   | 11,440 (12.8%) |       |
| M stage           | M0        | 85,028 (50.5%)  | 31,471 (37.2%) | 0.001 |
|                   | M1        | 83,287 (49.5%)  | 53,209 (62.8%) |       |
| Chemotherapy      | Yes       | 88,869 (51.4%)  | 41,684 (46.7%) | 0.001 |
|                   | No        | 84,156 (48.6%)  | 47,500 (53.3%) |       |
| Radiation Therapy | Yes       | 26,333 (15.2%)  | 8,741 (9.8%)   | 0.001 |
|                   | No        | 146,692 (84.8%) | 80,443 (90.2%) |       |
| Immunotherapy     | Yes       | 612 (0.4%)      | 286 (0.3%)     | 0.2   |
|                   | No        | 172,413 (99.6%) | 88,898 (99.7%) |       |
| Year of Diagnosis | 2004-2010 | 115,561 (66.8%) | 10,204 (11.4%) | 0.001 |
|                   | 2011-2016 | 57,464 (33.2%)  | 78,980 (88.6%) |       |
