# Supplementary material
Source: publisher figshare collection journal article supplement (https://future-science-group.figshare.com/articles/dataset/_/19121849)
Supplement: Supplementary file 4 [file 1]

Supplemental Table 4 Multivariable Cox regression analysis including tumor size and metastatic location

| Variable                      |                         | Multivariable analysis |        |
|-------------------------------|-------------------------|------------------------|--------|
|                               |                         | Hazard Ratio (95% CI)  | P      |
| Hospital Type                 | Academic                | Ref                    |        |
|                               | Community               | 1.174 (1.157-1.190)    | 0.0001 |
| Age at diagnosis (continuous) |                         | 1.013 (1.013-1.014)    | 0.0001 |
| Sex                           | Male                    | Ref                    |        |
|                               | Female                  | 0.958 (0.945-0.971)    | 0.0001 |
| Race                          | White                   | Ref                    |        |
|                               | Black                   | 0.970 (0.949-0.991)    | 0.0047 |
|                               | neither White nor Black | 0.883 (0.851-0.917)    | 0.0001 |
| Education                     | >=13% NHD*              | 0.964 (0.948-0.980)    | 0.0001 |
|                               | <13% NHD*               | Ref                    |        |
| Income                        | >=\$35,000              | Ref                    |        |
|                               | <\$35,000               | 1.087 (1.069-1.105)    | 0.0001 |
| Place of Living               | Urban                   | Ref                    |        |
|                               | Rural                   | 1.065 (1.014-1.120)    | 0.0126 |
| Insurance Status              | Insured                 | Ref                    |        |
|                               | Not insured             | 1.062 (1.019-1.107)    | 0.0044 |
| Charlson/Deyo Score           | 0                       | Ref                    |        |
|                               | 1                       | 1.095 (1.077-1.112)    | 0.0001 |
|                               | >=2                     | 1.336 (1.306-1.366)    | 0.0001 |
| M stage                       | M0                      | 0.714 (0.698-0.731)    | 0.0001 |
|                               | M1                      | Ref                    |        |
| Chemotherapy                  | Yes                     | Ref                    |        |
|                               | No                      | 2.351 (2.315-2.388)    | 0.0001 |
| Radiation Therapy             | Yes                     | Reference              |        |

|                  |               |                     |        |
|------------------|---------------|---------------------|--------|
|                  | No            | 1.092 (1.069-1.116) | 0.001  |
| Immunotherapy    | Yes           | Ref                 |        |
|                  | No            | 1.159 (1.018-1.320) | 0.0256 |
| Liver metastases | No            | 0.736 (0.720-0.752) | 0.0001 |
|                  | Yes           | Ref                 |        |
| Lung metastases  | No            | 0.910 (0.890-0.931) | 0.0001 |
|                  | Yes           | Ref                 |        |
| Bone metastases  | No            | 0.801 (0.771-0.831) | 0.0001 |
|                  | Yes           | Ref                 |        |
| Brain metastases | No            | 0.779 (0.697-0.871) | 0.0001 |
|                  | Yes           | Ref                 |        |
| Tumor size       | <=2cm         | 0.738 (0.719-0.757) | 0.0001 |
|                  | 2< size<=4 cm | 0.860 (0.848-0.873) | 0.0001 |
|                  | >4cm          | Ref                 |        |

\*NHD: No high school degree
