# Supplementary material
Source: publisher figshare collection journal article supplement (https://future-science-group.figshare.com/articles/dataset/_/19121849)
Supplement: Supplementary file 5 [file 1]

Supplemental Table 5 The association of RT fractions and total dose with the facility type

| RT                                          | Academic facility | Non-academic facility | P     |
|---------------------------------------------|-------------------|-----------------------|-------|
| 5 fractions and total dose 25-50 Gray       | 999 (6.8%)        | 438 (2.2%)            | 0.001 |
| 10 fractions and total dose of 30-50 Gray   | 643 (4.4%)        | 962 (4.7%)            |       |
| 15 fractions and total dose of 37.5-50 Gray | 124 (0.9%)        | 244 (1.2%)            |       |
| 20 fractions and total dose of 40-50 Gray   | 120 (0.8%)        | 147 (0.7%)            |       |
| 25 fractions and total dose of 50 Gray      | 345 (2.35%)       | 316 (1.6%)            |       |
| Total dose >50 Gray                         | 8,267 (56.4%)     | 10,759 (53.0%)        |       |
| Total dose <50 Gray                         | 4,161 (28.4%)     | 7,441 (36.6%)         |       |
| Total                                       | 14,659            | 20,307                |       |
